# Supplementary material
Source: publisher site journal article supplement (http://kjim.org/upload/media/kjim-2018-064-suppl.pdf)
Supplement: Supplementary file 1 [file kjim-2018-064-suppl.pdf]

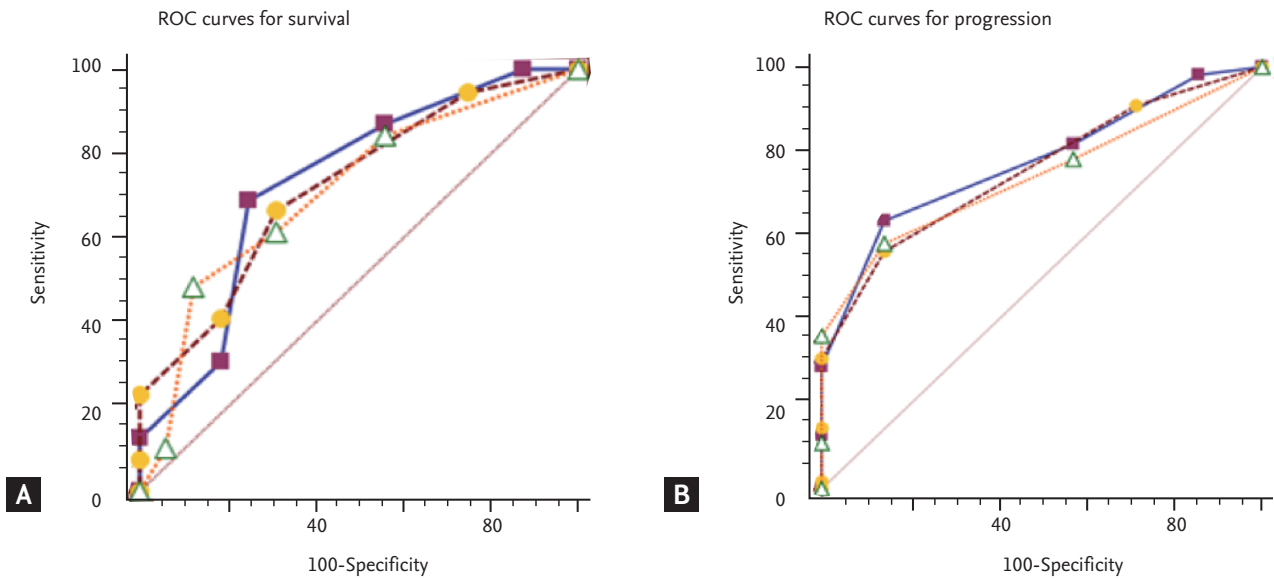

**Supplementary Figure 1.** Comparison of receiver-operating characteristic (ROC) curves for (A) survival and (B) progression.
